FALL 2017 | VOLUME 15 | NUMBER 4

# Focus

The Journal of Lifelong Learning in Psychiatry

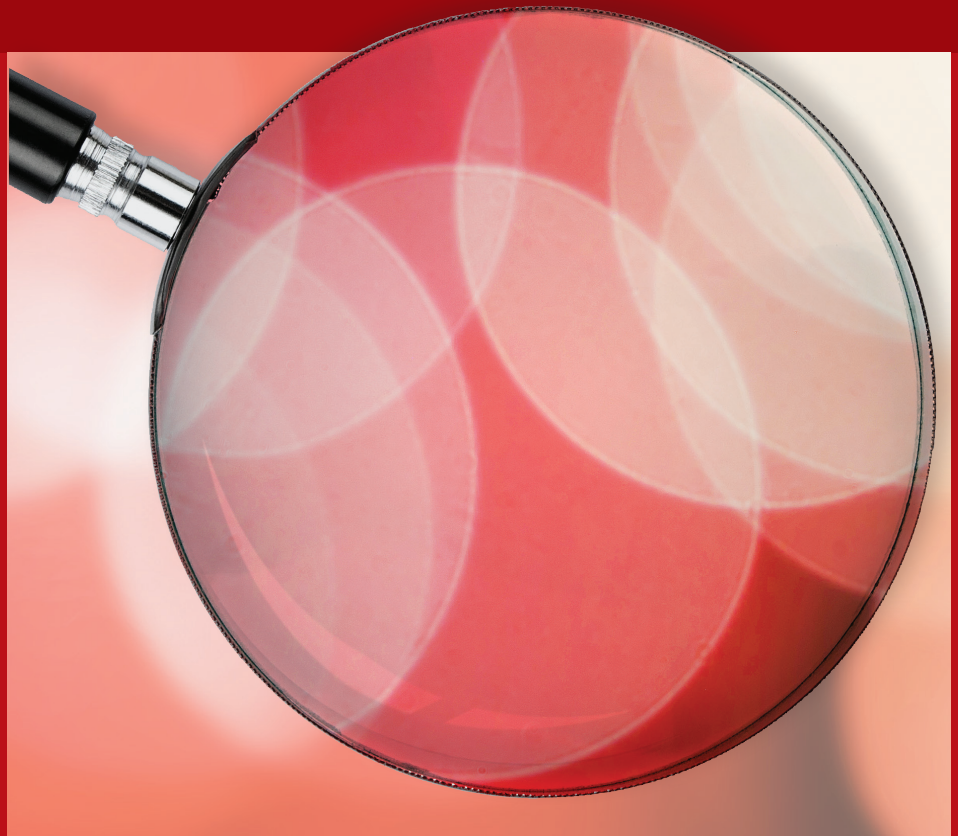

## Treating the Invisible Wounds of War: Focus on PTSD and TBI

Guest Editors: Mark H. Pollack, M.D., Naomi M. Simon, M.D., M.Sc.,  
and Barbara O. Rothbaum, Ph.D., A.B.P.P.

AMERICAN  
PSYCHIATRIC  
ASSOCIATION 

[focus.psychiatryonline.org](http://focus.psychiatryonline.org)
