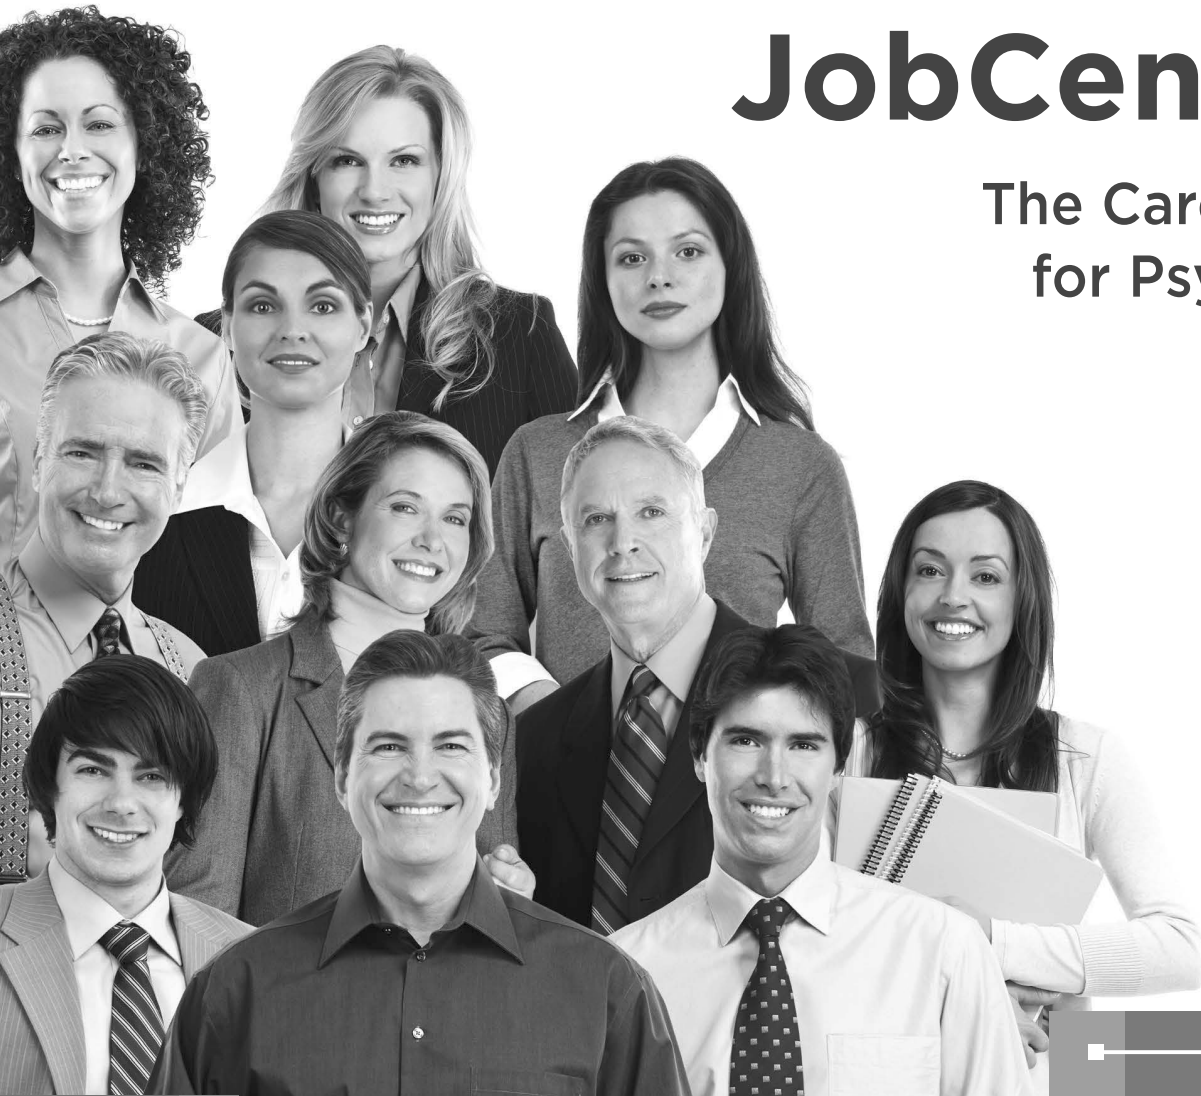

# JobCentral

The Career Hub  
for Psychiatry

## Manage Your Career

- Browse thousands of active job listings!
- Create an account to save jobs, store multiple resumes and cover letters and communicate with employers through our internal messaging system.
- Set up multiple job alerts specifying your skills, interests and location to receive e-mails when employers post jobs that match your criteria.

## Recruit for Open Positions

- Post your job in front of thousands of highly qualified psychiatrists.
- Cross promote your job listing in Psychiatric News.
- Search the anonymous resume database to find your ideal candidate.

AMERICAN  
PSYCHIATRIC  
ASSOCIATION

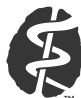

**JOBCENTRAL**  
The Career Hub for

**jobs.psychiatry.org**

# New and Essential Geriatric Psychiatry Titles

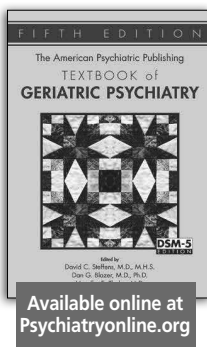

## The American Psychiatric Publishing Textbook of Geriatric Psychiatry, Fifth Edition

*Edited by David C. Steffens, M.D., M.H.S., Dan G. Blazer, M.D., Ph.D., and Mugdha E. Thakur, M.D.*

This Fifth Edition is an indispensable resource for psychiatric clinicians and trainees charged with assessing, diagnosing, and treating mental disorders. Building on the prodigious strengths of previous editions, this revision is the most current, comprehensive, and systematic textbook of geriatric psychiatry available today, and the only one that is DSM-5® concordant.

Widely recognized as the standard in its field, the book serves a critical need for clinicians challenged to meet the mental health needs of an aging population.

2015 • 837 pages • ISBN 978-1-58562-484-3 • Hardcover • \$192.00 • Item #62484  
2015 • 837 pages • ISBN 978-1-58562-522-2 • eBook • \$154.00 • Item #62522  
2015 • 12 Month Subscription • Online at Psychiatryonline.org • \$166.00 • Item #537005

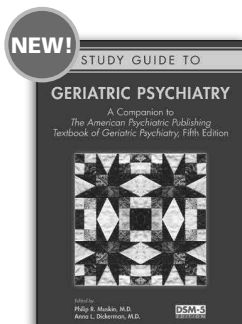

## Study Guide to Geriatric Psychiatry

*A Companion to The American Psychiatric Publishing Textbook of Geriatric Psychiatry, Fifth Edition*

*Philip R. Muskin, M.D., and Anna L. Dickerman, M.D.*

*Study Guide to Geriatric Psychiatry* is a question-and-answer companion that allows you to evaluate your mastery of the subject matter as you progress through *The American Psychiatric Publishing Textbook of Geriatric Psychiatry, Fifth Edition*. The *Study Guide* is made up of approximately 255 questions divided into 25 individual quizzes that correspond to chapters in the textbook. Questions are followed by an answer guide that references relevant text in the textbook. Each answer is accompanied by a discussion that addresses the correct response and also explains why other responses are not correct.

2017 • 352 pages • ISBN 978-1-61537-045-0 • Paperback • \$62.00 • Item #37045  
2017 • 352 pages • ISBN 978-1-61537-106-8 • eBook • \$49.95 • Item #37106

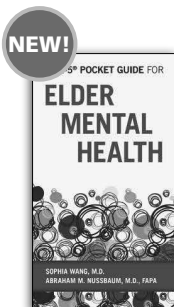

## DSM-5® Pocket Guide for Elder Mental Health

*Sophia Wang, M.D., and Abraham M. Nussbaum, M.D., FAPA*

The *DSM-5 Pocket Guide for Elder Mental Health* is an easily understandable tool for psychiatric and non-psychiatric professionals. It captures the essence of geriatric principles including care coordination, functional status, and the well-being of the caregiver as well as the patient in the context of well-crafted case scenarios. Drs. Wang and Nussbaum have truly operationalized the DSM-5 for geriatric providers and patients.

2017 • 375 pages • ISBN 978-1-61537-056-6 • Paperback • \$65.00 • Item #37056  
2017 • 375 pages • ISBN 978-1-61537-119-8 • eBook • \$52.00 • Item #37119

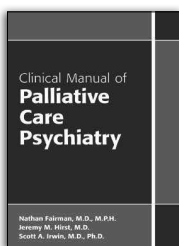

## Clinical Manual of Palliative Care Psychiatry

*Nathan Fairman, M.D., M.P.H., Jeremy M. Hirst, M.D., and Scott A. Irwin, M.D., Ph.D.*

The book seeks to bridge the gulf between principles and practice for two groups of clinicians: front-line palliative care providers with little mental health training and mental health specialists who may lack familiarity with palliative care practice. The book reviews palliative care principles and practice models, treatment of the psychiatric symptoms most commonly encountered in palliative care settings.

2016 • 297 pages • ISBN 978-1-58562-476-8 Paperback • \$61.00 • Item #62476  
2016 • 297 pages • ISBN 978-1-61537-061-0 • eBook • \$48.95 • Item #37061

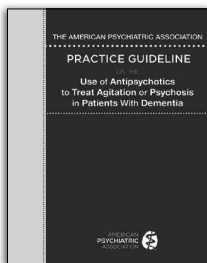

## The American Psychiatric Association Practice Guideline on the Use of Antipsychotics to Treat Agitation or Psychosis in Patients With Dementia

*American Psychiatric Association*

The guideline offers clear, concise, and actionable recommendation statements to help clinicians to incorporate recommendations into clinical practice, with the goal of improving quality of care. Each recommendation is given a rating that reflects the level of confidence that potential benefits of an intervention outweigh potential harms.

2016 • 218 pages • ISBN 978-0-89042-677-7 • Paperback • \$65.00 • Item #2677  
2016 • 218 pages • ISBN 978-0-89042-678-4 • eBook • \$52.00 • Item #2678

# Understanding Mental Disorders

Your Guide to DSM-5®

American Psychiatric Association

A consumer guide for anyone who has  
been touched by mental illness!

With Foreword by Patrick J. Kennedy

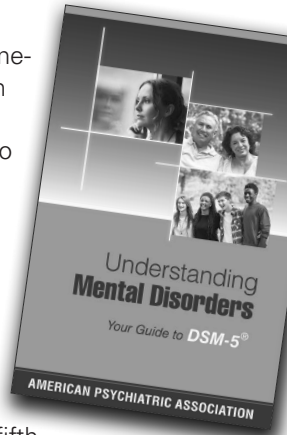

Most of us know someone who suffers from a mental illness. This book helps those who may be struggling with mental health problems, as well as those who want to help others achieve mental health and well-being.

Based on the latest, fifth edition of the *Diagnostic and Statistical Manual of Mental Disorders*—known as DSM-5®—**Understanding Mental Disorders** provides valuable insight on what to expect from an illness and its treatment—and will help readers recognize symptoms, know when to seek help, and get the right care. Featured disorders include depression, schizophrenia, ADHD, autism spectrum disorder, posttraumatic stress disorder, and bipolar disorder, among others.

2015 • 388 pages • ISBN 978-1-58562-491-1  
Paperback • \$24.95 • Item #62491

AMERICAN  
PSYCHIATRIC  
ASSOCIATION  
PUBLISHING

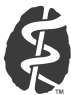

www.appi.org

Phone: 703-907-7322

Toll Free: 1-800-368-5777

Email: appi@psych.org

20% Discount • American Psychiatric Association Members  
25% Discount • APA Resident-Fellow Members

AH1718

## Statement of Ownership, Management, and Circulation (All Periodicals Publications Except Requester Publications)

PS Form 3526

|                                                                                                                                                                                                                                                                                                                                                                                                                                                                                                                                                                         |                                                     |                                           |                                |
|-------------------------------------------------------------------------------------------------------------------------------------------------------------------------------------------------------------------------------------------------------------------------------------------------------------------------------------------------------------------------------------------------------------------------------------------------------------------------------------------------------------------------------------------------------------------------|-----------------------------------------------------|-------------------------------------------|--------------------------------|
| 1. Publication Title<br>AMERICAN PSYCHIATRIC PUBLISHING INC/<br>FOCUS                                                                                                                                                                                                                                                                                                                                                                                                                                                                                                   | 2. Publication Number<br>21577                      | ISSN<br>15414094                          | 3. Filing Date<br>09/12/2017   |
| 4. Issue Frequency<br>QUARTERLY                                                                                                                                                                                                                                                                                                                                                                                                                                                                                                                                         | 5. Number of Issues Published Annually<br>4         | 6. Annual Subscription Price<br>\$ 616.00 |                                |
| 7. Complete Mailing Address of Known Office of Publication<br>1000 WILSON BLVD STE 1825<br>ARLINGTON, ARLINGTON, VA 22209-3924                                                                                                                                                                                                                                                                                                                                                                                                                                          |                                                     |                                           | Contact Person<br>ROGER DOMRAS |
| 8. Complete Mailing Address of Headquarters or General Business Office of Publisher<br>1000 Wilson Blvd., Ste. 1825<br>Arlington, VA 22209-3924                                                                                                                                                                                                                                                                                                                                                                                                                         |                                                     |                                           | Telephone<br>(703) 907-8544    |
| 9. Full Names and Complete Mailing Addresses of Publisher, Editor, and Managing Editor                                                                                                                                                                                                                                                                                                                                                                                                                                                                                  |                                                     |                                           |                                |
| Publisher (Name and complete mailing address)<br>John McDuffie<br>1000 WILSON BLVD STE 1825<br>ARLINGTON, VA 22209-3924                                                                                                                                                                                                                                                                                                                                                                                                                                                 |                                                     |                                           |                                |
| Editor (Name and complete mailing address)<br>Mark Hyman Rapaport, M.D.<br>1000 WILSON BLVD STE 1825<br>ARLINGTON, VA 22209-3924                                                                                                                                                                                                                                                                                                                                                                                                                                        |                                                     |                                           |                                |
| Managing Editor (Name and complete mailing address)<br>Dennarie S. Jackson<br>1000 Wilson Blvd., Ste. 1825<br>Arlington, VA 22209-3924                                                                                                                                                                                                                                                                                                                                                                                                                                  |                                                     |                                           |                                |
| 10. Owner (Do not leave blank. If the publication is owned by a corporation, give the name and address of the corporation immediately followed by the names and addresses of all stockholders owning or holding 1 percent or more of the total amount of stock. If not owned by a corporation, give names and addresses of the individual owners. If owned by a partnership or other unincorporated firm, give its name and address as well as those of each individual owner. If the publication is published by a nonprofit organization, give its name and address.) |                                                     |                                           |                                |
| Full Name                                                                                                                                                                                                                                                                                                                                                                                                                                                                                                                                                               | Complete Mailing Address                            |                                           |                                |
| American Psychiatric Assoc.                                                                                                                                                                                                                                                                                                                                                                                                                                                                                                                                             | 1000 WILSON BLVD STE 1825, ARLINGTON, VA 22209-3924 |                                           |                                |
| 11. Known Bondholders, Mortgagees, and Other Security Holders Owning or Holding 1 Percent or More of Total Amount of Bonds, Mortgages, or Other Securities. If none, check box <input checked="" type="checkbox"/> None                                                                                                                                                                                                                                                                                                                                                 |                                                     |                                           |                                |
| Full Name                                                                                                                                                                                                                                                                                                                                                                                                                                                                                                                                                               | Complete Mailing Address                            |                                           |                                |
| PS Form 3526, September 2007 (Page 1) <span style="float: right;">PRIVACY NOTICE: See our privacy policy on www.usps.com</span>                                                                                                                                                                                                                                                                                                                                                                                                                                         |                                                     |                                           |                                |

|                                                                                                                                                                                                                                                                                          |                                                          |                                                             |
|------------------------------------------------------------------------------------------------------------------------------------------------------------------------------------------------------------------------------------------------------------------------------------------|----------------------------------------------------------|-------------------------------------------------------------|
| 13. Publication Title<br>AMERICAN PSYCHIATRIC PUBLISHING INC/FOCUS                                                                                                                                                                                                                       | 14. Issue Date for Circulation Data Below<br>07/01/2017  |                                                             |
| 15. Extend and Nature of Circulation                                                                                                                                                                                                                                                     | Average No. Copies Each Issue During Preceding 12 Months | No. Copies of Single Issue Published Nearest to Filing Date |
| a. Total Numbers of Copies (Net press run)                                                                                                                                                                                                                                               | 2650                                                     | 2530                                                        |
| b. Paid Circulation (By Mail and Outside the Mail)                                                                                                                                                                                                                                       |                                                          |                                                             |
| (1) Mailed Outside County Paid Subscriptions Stated on PS Form 3541 (include paid distribution above nominal rate, advertiser's proof copies, and exchange copies)                                                                                                                       | 1360                                                     | 1234                                                        |
| (2) Mailed In-County Paid Subscriptions Stated on PS Form 3541 (include paid distribution above nominal rate, advertiser's proof copies, and exchange copies)                                                                                                                            | 0                                                        | 0                                                           |
| (3) Paid Distribution Outside the Mails Including Sales Through Dealers and Carriers, Street Vendors, Counter Sales, and Other Paid Distribution Outside USPS                                                                                                                            | 62                                                       | 61                                                          |
| (4) Paid Distribution by Other Classes of Mail Through the USPS (e.g. First-Class Mail)                                                                                                                                                                                                  | 0                                                        | 0                                                           |
| c. Total Paid Distribution (Sum of 15b (1), (2), (3), (4))                                                                                                                                                                                                                               | 1422                                                     | 1295                                                        |
| d. Free or Nominal Rate Distribution (By Mail and Outside the Mail)                                                                                                                                                                                                                      |                                                          |                                                             |
| (1) Free or Nominal Rate Outside County Copies included on PS Form 3541                                                                                                                                                                                                                  | 235                                                      | 382                                                         |
| (2) Free or Nominal Rate In-County Copies included on PS Form 3541                                                                                                                                                                                                                       | 0                                                        | 0                                                           |
| (3) Free or Nominal Rate Copies Mailed at Other Classes Through the USPS (e.g. First-Class Mail)                                                                                                                                                                                         | 0                                                        | 0                                                           |
| (4) Free or Nominal Rate Distribution Outside the Mail (carriers or other means)                                                                                                                                                                                                         | 0                                                        | 0                                                           |
| e. Total Free or Nominal Rate Distribution (Sum of 15d (1), (2), (3), (4))                                                                                                                                                                                                               | 235                                                      | 382                                                         |
| f. Total Distribution (Sum of 15c and 15e)                                                                                                                                                                                                                                               | 1657                                                     | 1677                                                        |
| g. Copies not Distributed                                                                                                                                                                                                                                                                | 0                                                        | 0                                                           |
| h. Total (Sum of 15f and 15g)                                                                                                                                                                                                                                                            | 1657                                                     | 1677                                                        |
| i. Percent Paid ((15c / 15f) times 100)                                                                                                                                                                                                                                                  | 85.82 %                                                  | 77.22 %                                                     |
| 16. If total circulation includes electronic copies, report that circulation on lines below.                                                                                                                                                                                             |                                                          |                                                             |
| a. Paid Electronic Copies                                                                                                                                                                                                                                                                | 0                                                        | 0                                                           |
| b. Total Paid Print Copies (Line 15c) + Paid Electronic Copies                                                                                                                                                                                                                           | 0                                                        | 0                                                           |
| c. Total Print Distribution (Line 15f) + Paid Electronic Copies                                                                                                                                                                                                                          | 0                                                        | 0                                                           |
| d. Percent Paid (Both Print and Electronic Copies)                                                                                                                                                                                                                                       | 0.00 %                                                   | 0.00 %                                                      |
| <input type="checkbox"/> I certify that 50% of all my distributed copies (Electronic and Print) are paid above a nominal price.                                                                                                                                                          |                                                          |                                                             |
| 17. Publication of Statement of Ownership<br><input checked="" type="checkbox"/> If the publication is a general publication, publication of this statement is required. Will be printed in the 10/01/2017 issue of this publication. <input type="checkbox"/> Publication not required. |                                                          |                                                             |

|                                                                                                                                                                                                                                                                                                                                                        |                                    |                        |
|--------------------------------------------------------------------------------------------------------------------------------------------------------------------------------------------------------------------------------------------------------------------------------------------------------------------------------------------------------|------------------------------------|------------------------|
| 18. Signature and Title of Editor, Publisher, Business Manager, or Owner                                                                                                                                                                                                                                                                               | Title                              | Date                   |
| Debra Eubanks                                                                                                                                                                                                                                                                                                                                          | Dir. Finance Publishing Operations | 09/12/2017 13:47:18 PM |
| I certify that all information furnished on this form is true and complete. I understand that anyone who furnishes false or misleading information on this form or who omits material or information requested on the form may be subject to criminal sanctions (including fines and imprisonment) and/or civil sanctions (including civil penalties). |                                    |                        |

PS Form 3526, September 2007 (Page 2)

PRIVACY NOTICE: See our privacy policy on www.usps.com

# Subscribe today to the highest ranked mental health journal in the Health Policy & Services category!\*

## ▶ Don't miss the October issue:

- Understanding the costs of integrated care models from a CMHC perspective
- A survey of child psychiatrists on mental health crisis management for youths with autism spectrum disorder
- Aligning terminology to be in step with recovery-oriented mental health
- APA 2016–2017 Achievement Awards: outstanding programs

## ▶ Coming in the November issue:

- Using digital media advertising to encourage help seeking in early psychosis intervention
- A qualitative study of involuntary hospital admission experiences
- SOAR disability application outcomes among homeless adults
- MOMCare collaborative care for perinatal depression: costs and benefits

## ▶ One low price covers your print and online subscription.

\$ 115 APA Member print and online subscription

\$ 105 APA Member online-only subscription

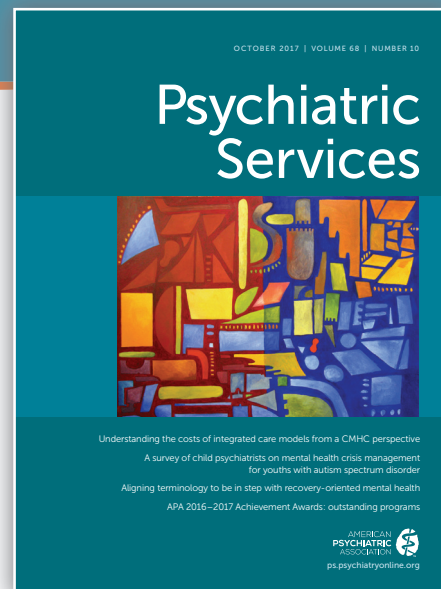

**PSYCHIATRIC  
SERVICES**  
FROM PAGES  
TO PRACTICE

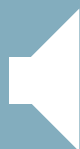

Listen to our podcast,  
***Psychiatric Services From Pages to Practice!***

[ps.psychiatryonline.org](http://ps.psychiatryonline.org)

Subscribe today at [www.appi.org](http://www.appi.org) or call  
Customer Service at 1-800-368-5777.

\*By its most recent Impact Factor (2.888), *Psychiatric Services* is the highest ranked mental health services journal in the Health Policy & Services Category of ISI's Journal Citation Reports. Of the 77 peer-reviewed journals included in the Health Policy & Services Category, *Psychiatric Services* ranks 8th.

AMERICAN  
PSYCHIATRIC  
ASSOCIATION  
PUBLISHING

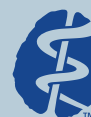

[www.appi.org](http://www.appi.org)
